# Supplementary material for: Short-Term Exposure to Ambient Air Pollution and Onset of Severe Mental Disorders: A Case-Crossover Study in Northwestern China
Source: Research Square preprint supplement (doi:10.21203/rs.3.rs-7468223/v1), 2025-09-15
Supplement: Supplementary file 1 [file c8709a29b2a9f8415d13d5c2.docx]

**Short-Term Exposure to Ambient Air Pollution and Onset of Severe Mental Disorders: A case-crossover study in northwestern China**

Yajin Han1,†, Guangrui Yang2,†, Jinshi Wang1, Weimin Pan3,*, Xiaofeng Luo1,*

**Figure S1.** Spatial distributions of 49,707 cases’ home addresses (dots) in Gansu province, China, from 2013 to 2020.

**Table S1.** Spearman correlation coefficients between air pollutants and meteorological conditions during case and control days in Gansu Province, China, 2013-2020*

**Figure S2.** Percentage changes in odds ratios and 95% CI for onset of severe mental disorders associated with each interquartile range increase of exposures to PM2.5 (interquartile range, 23.1 μg/m3), PM10 (57.5 μg/m3), SO2 (19.1 μg/m3), NO2 (11.9 μg/m3), CO (0.51 mg/m3), and O3 (38.3 μg/m3) with different lag periods, restricted to Han race onset cases.

**Figure S3.** Percentage changes in odds ratios and 95% confidence intervals for onset of severe mental disorders associated with each interquartile range increase of exposures to PM2.5 (interquartile range，23.1 μg/m3), PM10 (57.5 μg/m3), SO2 (19.1 μg/m3), NO2 (11.9 μg/m3), CO (0.51 mg/m3), and O3 (38.3 μg/m3) with different lag periods, restricted to cases who diagnosed with “schizophrenia, schizotypal, and delusional disorders”.

**Figure S4.** Percentage changes in odds ratios and 95% confidence intervals for onset of severe mental disorders associated with each interquartile range increase of exposures to PM2.5 (interquartile range, 23.1 μg/m3), PM10 (57.5 μg/m3), SO2 (19.1 μg/m3), NO2 (11.9 μg/m3), CO (0.51 mg/m3), and O3 (38.3 μg/m3) with different lag periods, adjusting for temperature with a *df* of 3.


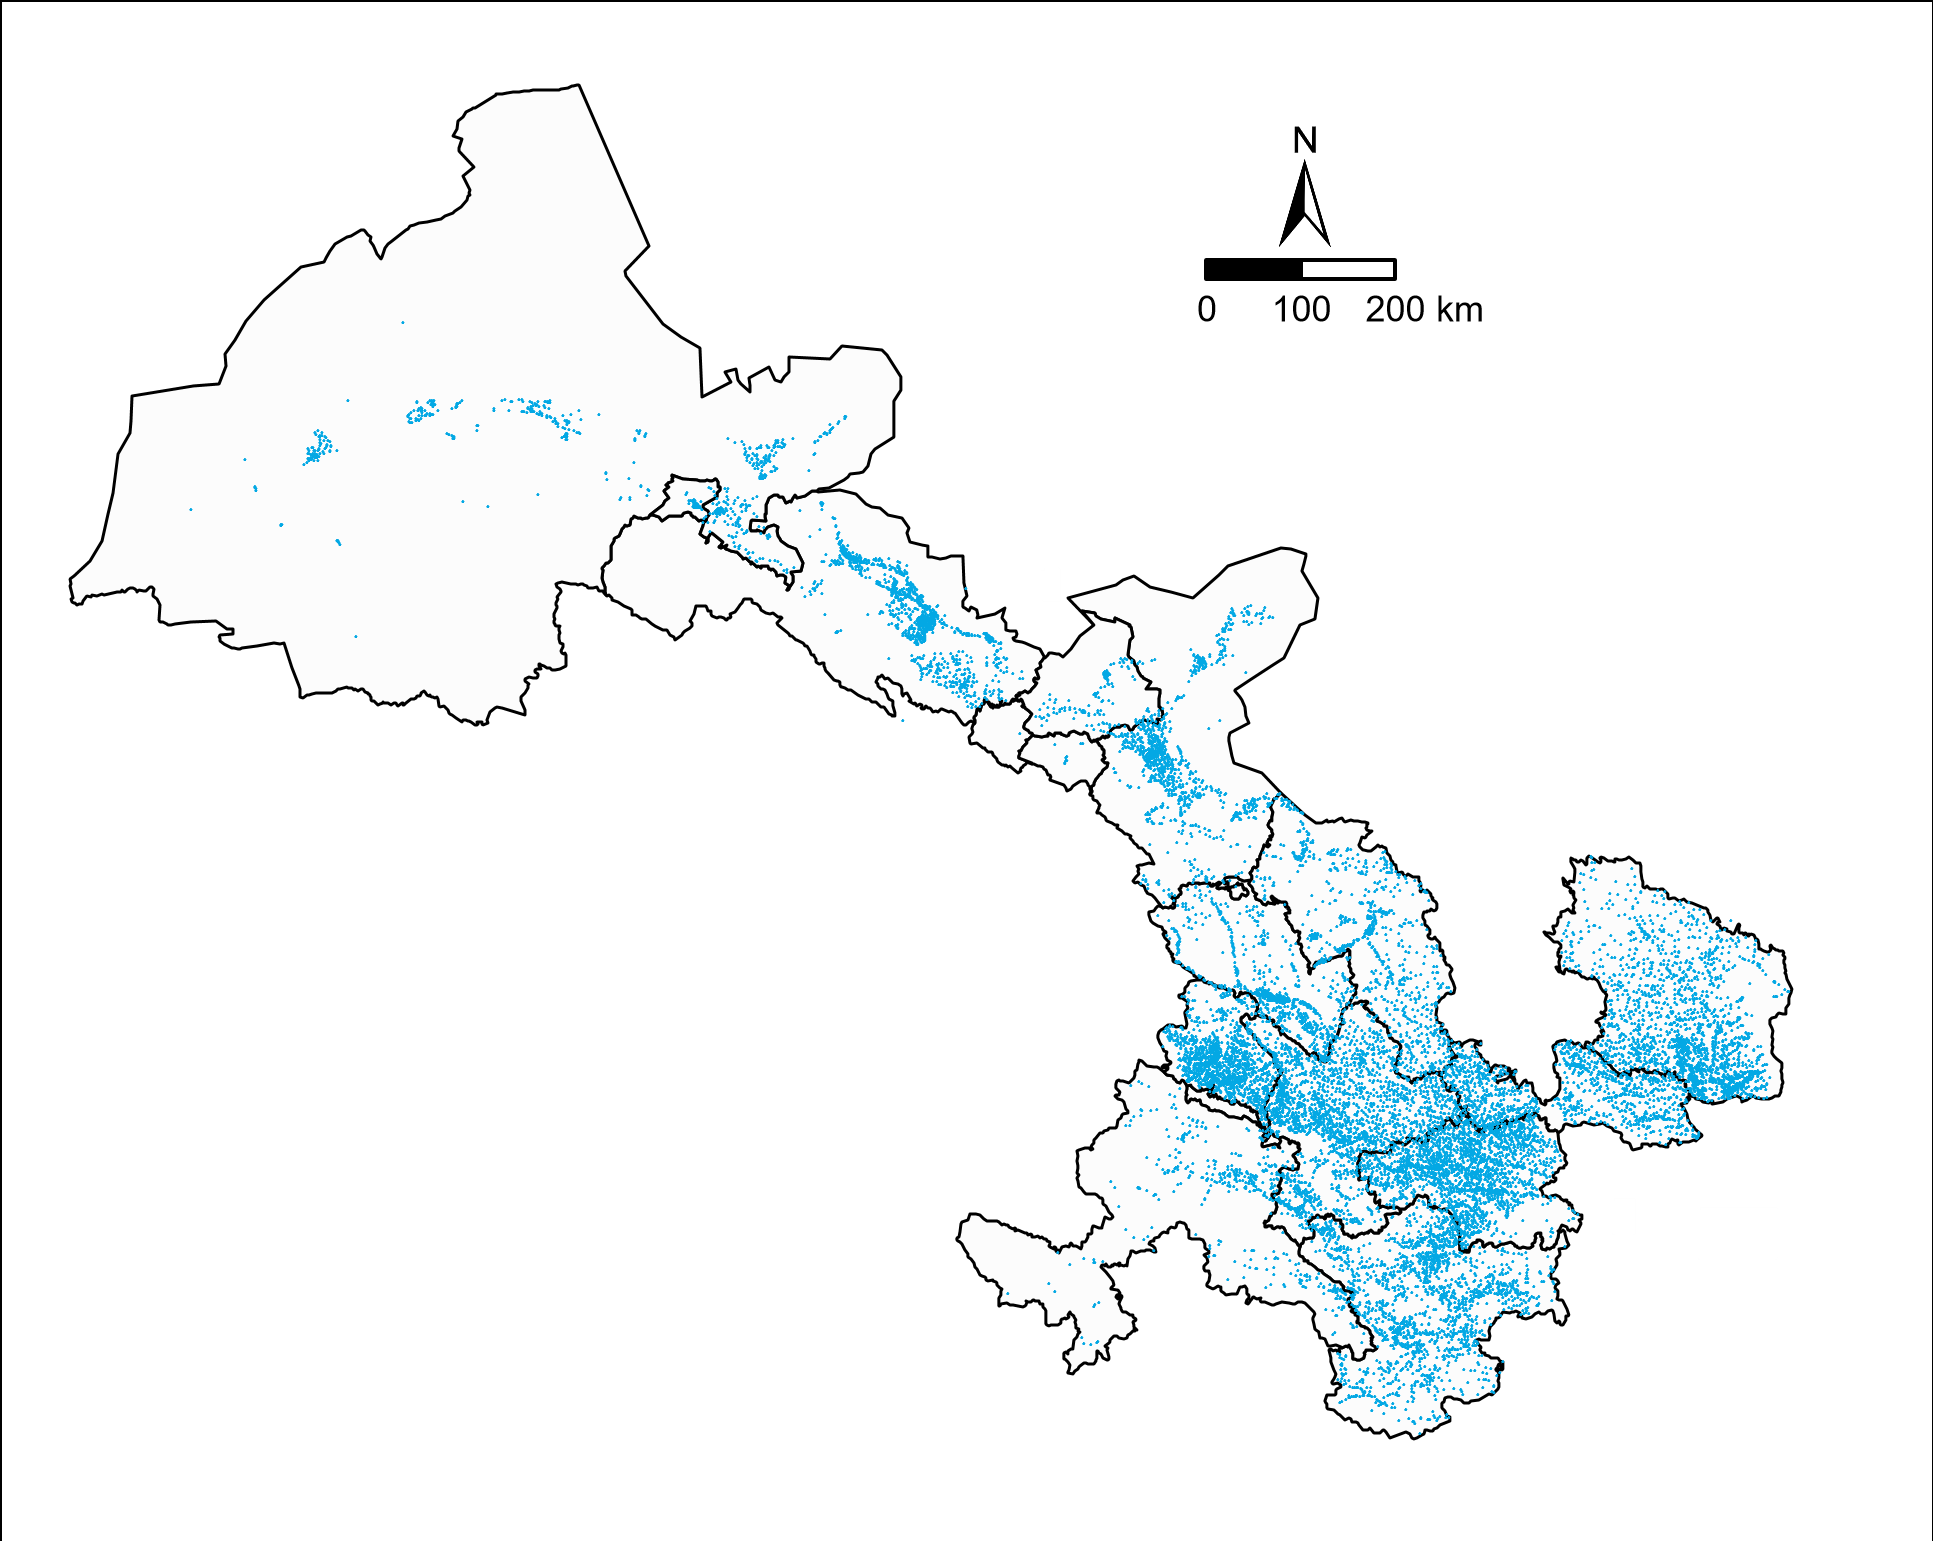


**Figure S1.** Spatial distributions of 49,707 cases’ home addresses (dots) in Gansu province, China, from 2013 to 2020. Each point indicates a case.

**Table S1.** Spearman correlation coefficients between air pollutants and meteorological conditions during case and control days in Gansu Province, China, 2013-2020*

|  | PM2.5 | CO | NO2 | O3 | PM10 | SO2 | Relative humidity |
| --- | --- | --- | --- | --- | --- | --- | --- |
| CO | 0.67 | — | — | — | — | — | — |
| NO2 | 0.51 | 0.61 | — | — | — | — | — |
| O3 | -0.45 | -0.54 | -0.37 | — | — | — | — |
| PM10 | 0.87 | 0.52 | 0.41 | -0.22 | — | — | — |
| SO2 | 0.68 | 0.74 | 0.57 | -0.48 | 0.61 | — | — |
| Relative humidity | -0.14 | -0.09 | -0.13 | -0.25 | -0.33 | -0.17 | — |
| Temperature | -0.57 | -0.50 | -0.45 | 0.67 | -0.43 | -0.56 | -0.14 |

Abbreviations: PM2.5, particulate matter with an aerodynamic diameter ≤2.5 mm; CO, carbon monoxide; NO2, nitrogen dioxide; O3, ozone; PM10, particulate matter with an aerodynamic diameter ≤10 mm; SO2, sulfur dioxide.

Notes*: All pairwise correlation coefficients were statistically significant(P<0.05)

**Figure S2.** Percentage changes in odds ratios and 95% CI for onset of severe mental disorders associated with each interquartile range increase of exposures to PM2.5 (interquartile range, 23.1 μg/m3), PM10 (57.5 μg/m3), SO2 (19.1 μg/m3), NO2 (11.9 μg/m3), CO (0.51 mg/m3), and O3 (38.3 μg/m3) with different lag periods, restricted to Han race onset cases.

Abbreviations: PM2.5, particulate matter with an aerodynamic diameter ≤2.5 mm; CO, carbon monoxide; NO2, nitrogen dioxide; O3, ozone; PM10, particulate matter with an aerodynamic diameter ≤10 mm; SO2, sulfur dioxide.

**Figure S3.** Percentage changes in odds ratios and 95% confidence intervals for onset of severe mental disorders associated with each interquartile range increase of exposures to PM2.5 (interquartile range，23.1 μg/m3), PM10 (57.5 μg/m3), SO2 (19.1 μg/m3), NO2 (11.9 μg/m3), CO (0.51 mg/m3), and O3 (38.3 μg/m3) with different lag periods, restricted to cases who diagnosed with “schizophrenia, schizotypal, and delusional disorders”.

Abbreviations: PM2.5, particulate matter with an aerodynamic diameter ≤2.5 mm; CO, carbon monoxide; NO2, nitrogen dioxide; O3, ozone; PM10, particulate matter with an aerodynamic diameter ≤10 mm; SO2, sulfur dioxide.

**Figure S4.** Percentage changes in odds ratios and 95% confidence intervals for onset of severe mental disorders associated with each interquartile range increase of exposures to PM2.5 (interquartile range，23.1 μg/m3), PM10 (57.5 μg/m3), SO2 (19.1 μg/m3), NO2 (11.9 μg/m3), CO (0.51 mg/m3), and O3 (38.3 μg/m3) with different lag periods, adjusting for temperature with a *df* of 3.

Abbreviations: PM2.5, particulate matter with an aerodynamic diameter ≤2.5 mm; CO, carbon monoxide; NO2, nitrogen dioxide; O3, ozone; PM10, particulate matter with an aerodynamic diameter ≤10 mm; SO2, sulfur dioxide.
